**Fig S1**

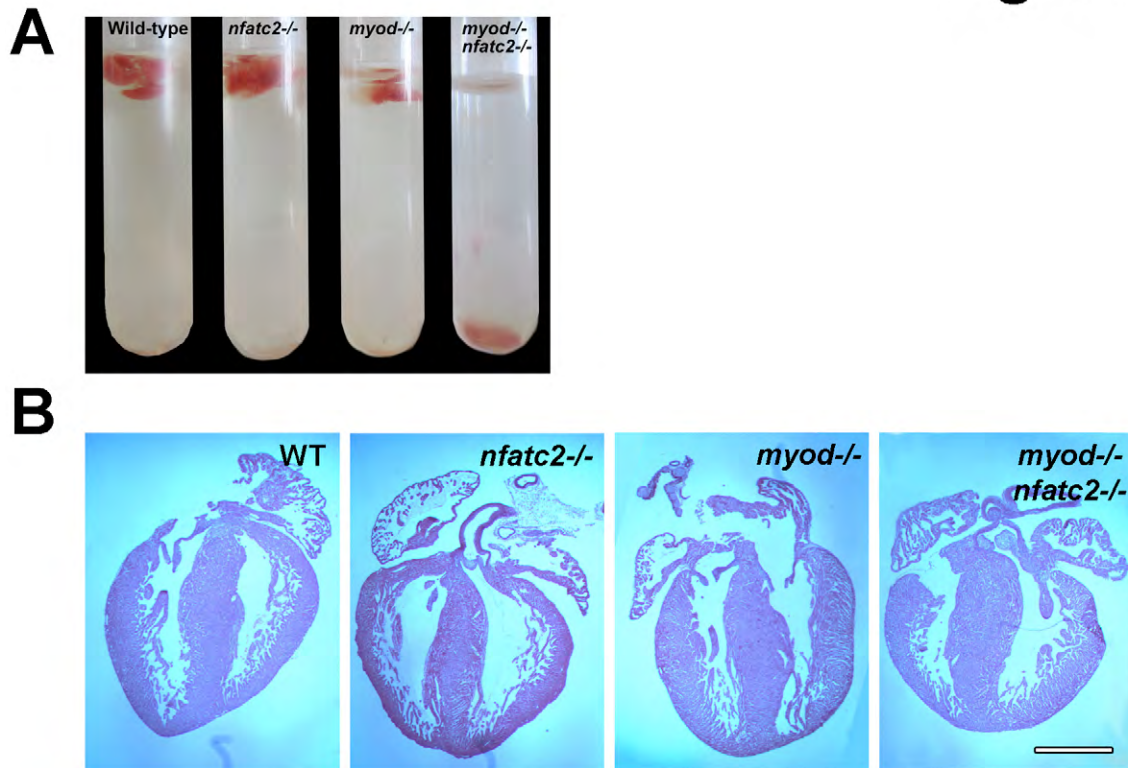

**Fig. S1: *myod/nfatc2* double null mice die at birth with respiratory defects.** (A) Lungs were dissected out from newborn mice and dropped in water. All lungs float except the *myod*<sup>-/-</sup>: *nfatc2*<sup>-/-</sup> lungs that sink to the bottom, indicating that they were not inflated with air. (B) Representative H&E stained four-chamber view of hearts dissected from newborn mice of indicated genotypes. No obvious cardiac phenotype was observed in any transgenic mice. Bar=750  $\mu$ m.

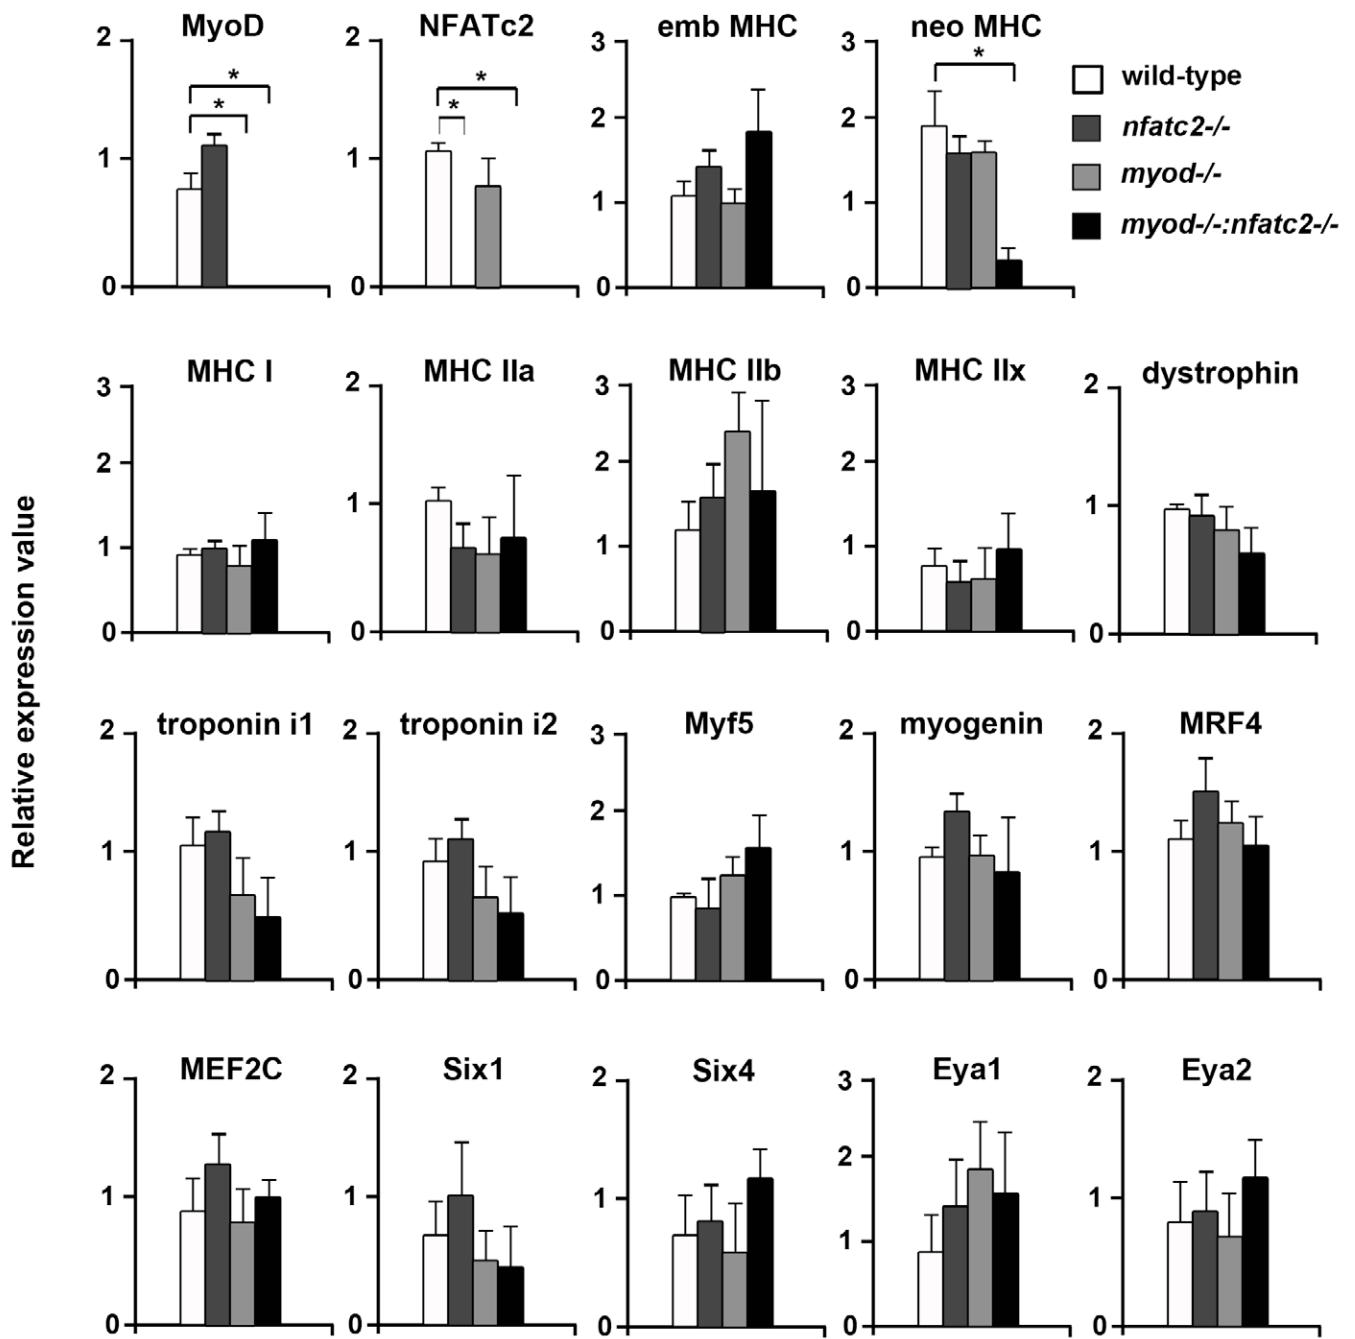

**Fig. S2:** The expression of the indicated muscle specific genes was analyzed by RT-qPCR from E18.5 limb muscles of WT, *nfatc2*<sup>-/-</sup>, *myod*<sup>-/-</sup>, *myod*<sup>-/-</sup>:*nfatc2*<sup>-/-</sup> mutant mice. Data are means±s.e.m. of three different experiments. Five to seven embryos of each genotype were analyzed. \* indicates  $P < 0.01$  vs WT.

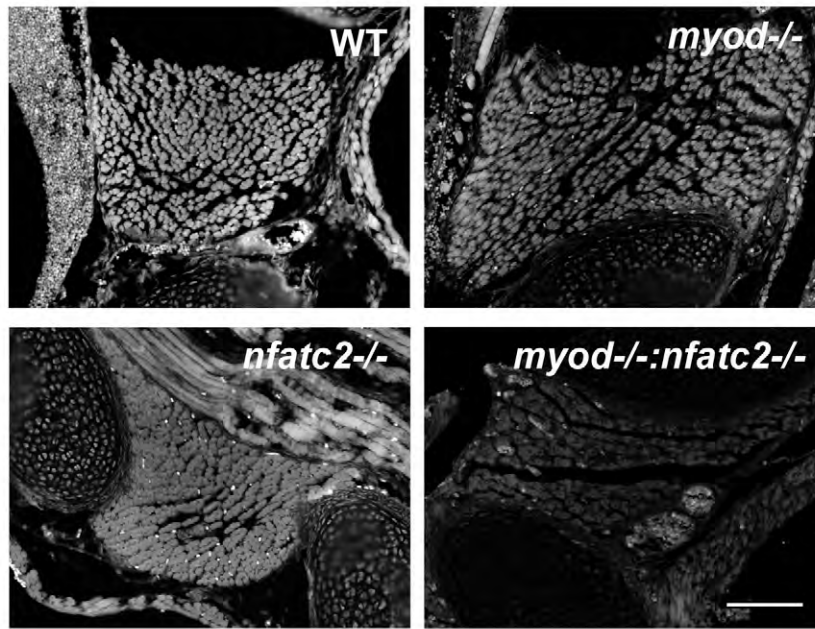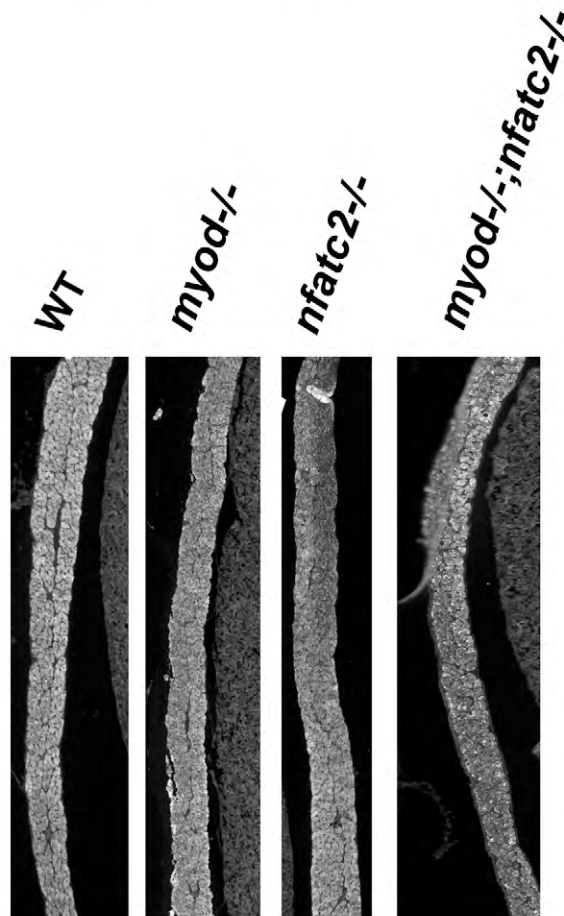

**Fig. S3: MyoD and NFATc2 are required for neo-MHC expression in intercostal muscles at E18.5.** Transverse cryosections of intercostal muscles (upper panels) and diaphragm (lower panel) were immunostained with neo-MHC antibodies, demonstrating that *myod/nfatc2* double null intercostal muscles but not diaphragm are deficient in neo-MHC proteins. Bar=40  $\mu$ m.

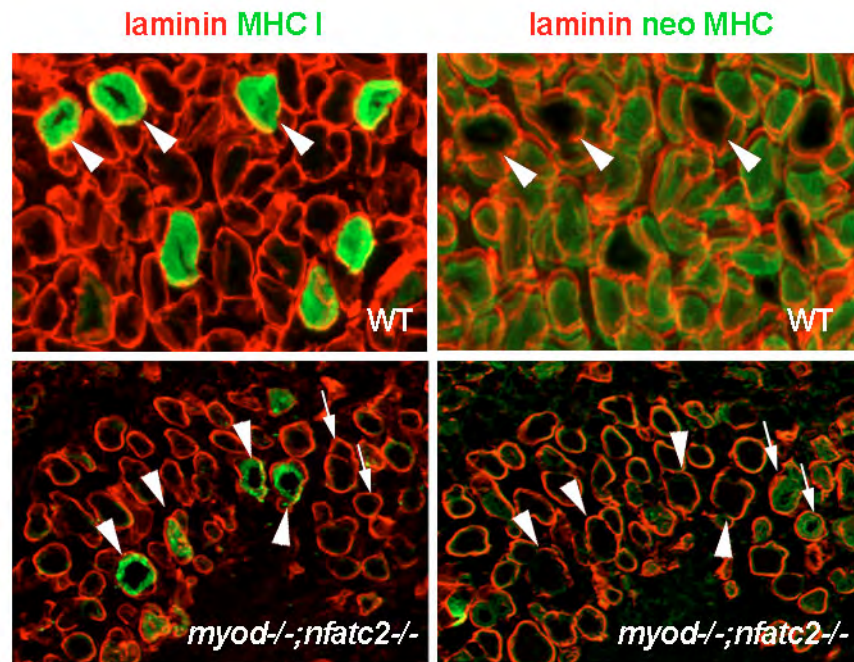

**Fig. S4:** Immunostaining of serial sections of E18.5 WT and *myod*<sup>-/-</sup>;*nfatc2*<sup>-/-</sup> limb muscles using anti-MHC I or anti-neo-MHC antibodies with the specific anti-laminin antibody. Primary myofibers are indicated by arrowheads. They express MHC I but not neo-MHC at this stage (Condon et al., 1990b). Secondary WT myofibers always express neo-MHC. In *myod*/*nfatc2* double null muscles, few secondary myofibers (pointed by arrows) express faint amount of neo-MHC.

**Table S1. Primers**

|                     |                    | <b>Sequence (5'-3')<br/>Forward primer</b> | <b>Sequence (5'-3')<br/>Reverse primer</b>   |  |
|---------------------|--------------------|--------------------------------------------|----------------------------------------------|--|
| <b>Chromatin IP</b> | Amplicon a         | AATGAGGGGATGGAAGATGA                       | CCAGACTTTGAGGGTGCATT                         |  |
|                     | Amplicon b         | TACGACATCCCTGCCTTCAT                       | CGGAAAGAAAAGAGAAAATGC                        |  |
|                     | Amplicon c         | ATCCCCATGTATCTCTCC                         | CTCATCCTTGAGCCTGACT                          |  |
|                     | Amplicon d         | AGTCAGGCTCCAAGGATGAG                       | CTGTGCTGCCAAAGATCAGA                         |  |
|                     | Amplicon e         | TCTGATCTTTGGCAGCACAG                       | GCGGAGATAGGGTGTGAGG                          |  |
|                     | Amplicon f         | GCTTGAGGGTAGGGGAAGCTT                      | CCAGGCTTCAGTGAGGGTAA                         |  |
|                     | Amplicon g         | TTTTTGAGGGACGGCTTGTA                       | GGAGGCTTGGCATGAAATAG                         |  |
|                     | Amplicon h         | GAACCAGGGCAGTGCTAAGT                       | CCATTGTTGCTCAAACCAA                          |  |
|                     | Amplicon i         | CAAAGCCATGTTTCCTTCT                        | CTCGCCAGAATCTTGACTCC                         |  |
|                     | Amplicon a'        | TGGACCAGGAAAGAGAGGAA                       | AGCAGGACCAACAAGCAAGT                         |  |
|                     | Amplicon b'        | TGATTTCAAGGGTGGGATGG                       | CGTATTTTTCGCCGTTGCC                          |  |
|                     | Amplicon c'        | TCAAGGCGTTCTCAAGGAAT                       | GTCCCTGTTCATTCTGTGG                          |  |
|                     | Amplicon d'        | CCATACGTCCACAAGTCTG                        | AAGCCTGCATTCTCCGTTA                          |  |
|                     | Amplicon e'        | GTTTGCTCTACCCGTGC                          | GCAATGAATGGAAGCCTCTC                         |  |
|                     | Amplicon f'        | GTGCTGAACCTTGTGTGAA                        | TCCATCTCGGTGTCGCTACT                         |  |
|                     | Control amplicon   | TCCTGGATTACTGTCAAGC                        | AACGAGTCTATGAGGGTAAAG                        |  |
| <b>qRT-PCR</b>      | NFATc2.2           | ATCTACCCAGATCAGTATGG                       | TCAGGAGTATACCATTCTCTC                        |  |
|                     | MyoD               | GGCTCTCTCTGCTCCTTTGA                       | AGTAGGGAAGTGTGCGTGTCT                        |  |
|                     | Emb MHC            | GCAAAGACCCGTGACTTCACCTCTAG                 | GCATGTGGAAAAGTGATACGTGG                      |  |
|                     | neo MHC            | GTCACGCAATGCAGAAGAGA                       | CAGGTCCTTCACCGTCTGTT                         |  |
|                     | MHC I              | AGGGCGACCTCAACGAGAT                        | CAGCAGACTCTGGAGGCTCTT                        |  |
|                     | MHC IIa            | CCAAGAAAGGTGCCAAGAAG                       | CGGGAGTCTTGTTTCATTG                          |  |
|                     | MHC IIb            | GCTTGAAAACGAGGTGGA                         | CCTCCTCAGCCTGTCTCTTG                         |  |
|                     | MHC IIx            | CGGTGTTGGAAGAAAGG                          | CAGGAGTCTTGTTTCATT                           |  |
|                     | myogenin           | TGACCCTACAGACGCCACAATC                     | CACACCCAGCCTGACAGACAATC                      |  |
|                     | MRF4               | TGCTAAGGAAGGAGGAGCAA                       | CCTGCTGGGTGAAGAATGTT                         |  |
|                     | Myf5               | AGGAAAAGAAGCCCTGAAGC                       | GCAAAAAGAACAGGCAGAGG                         |  |
|                     | Six1               | CTTTAAGGAGAAGTCTCGGG                       | TTCCAGAGGAGAGAGTTGAT                         |  |
|                     | Six4               | TCACTCCACATCCCTCTTC                        | CATCTGTTTCAAAGCGAGCA                         |  |
|                     | Eya1               | ACCTCCCGACTTCTCATT                         | AGAAGTGTGCTGACCCAGT                          |  |
|                     | Eya2               | ACCCGTTACTCCATTACCC                        | CCCCCTCTCTACAACACAA                          |  |
|                     | Troponin i1        | ATGCCGGAAGTTGAGAGGAAA                      | TCCGAGAGGTAACGCACCTT                         |  |
|                     | Troponin i2        | AGAGTGTGATGCTCCAGATAGC                     | AGCCACGTGATCTTCGCA                           |  |
|                     | Dystrophin         | TCTCCTTGCATTGGTTCC                         | GAGTTTGAGACGCTTTTGC                          |  |
|                     | MEF2C              | TGCTGGTCTCACCTGGTAAAC                      | ATCCTTTGATTCACTGATGGCAT                      |  |
|                     | 26S                | AGGAGAAAACAAGGTCGTGCCAAAA                  | GCGCAAGCAGGTCTGAATCGTG                       |  |
|                     | <b>Mutagenesis</b> | N2 neo                                     | GGCACTGGTCCAATGGTCTCGAGTCAGCATAAAGGTTCTTCTCG |  |
|                     |                    | N3 neo                                     | CCTGTTGGAAACAAATACTCGAGGTGAGTTGCTGGGCATCTG   |  |
| E8 neo              |                    | GAATTTTGTCAAGTATGAGTACCTAACTTAGTGGCAACC    |                                              |  |
| <b>EMSA</b>         | N2 neo             | gatcCCAATGGTGGAGACTCAGCATA                 |                                              |  |
|                     | N3 neo             | gatcACAAATAAGGAAAGTGAGTTGC                 |                                              |  |
|                     | N3 emb             | gatcGGATTATATCCAGTGCTGAA                   |                                              |  |
|                     | E8 neo             | gatcGAGTTATCAGCTGTAACCTTAGT                |                                              |  |

**Table S2. Antibodies**

|                         | <b>Antibody</b>               |                                     |                        |
|-------------------------|-------------------------------|-------------------------------------|------------------------|
| <b>Chromatin IP</b>     | NFATc3, monoclonal            | Santa Cruz (sc-8405X)               | 5µg                    |
|                         | NFATc2, polyclonal            | Santa Cruz (sc-13034X)              | 5 µg                   |
|                         | NFATc2, monoclonal            | Santa Cruz (sc-7296X)               | 5 µg                   |
|                         | NFATc1, polyclonal            | Santa Cruz (sc-1789)                | 5µg                    |
|                         | MyoD, monoclonal              | Santa Cruz (sc-760)                 | 5µg                    |
|                         | MyoD, polyclonal              | Santa Cruz (sc-304X)                | 5µg                    |
|                         | NFATc2, polyclonal            | Gift from JM Redondo, Madrid, Spain | 5µg                    |
|                         | Laminin, polyclonal           | Sigma                               | 5µg                    |
| <b>Immuno-detection</b> | Sarcomeric MHC, monoclonal    | DSHB (Iowa University) (MF20)       | IHC: 1/100<br>WB: 1/20 |
|                         | Embryonic MHC, monoclonal     | DSHB (Iowa University) (F1.652)     | IHC: 1/20<br>WB: 1/200 |
|                         | Neonatal MHC, monoclonal      | DSHB (Iowa University) (N3.36)      | IHC: 1/20<br>WB: 1/200 |
|                         | V5, monoclonal                | Invitrogen                          | WB: 1/1000             |
|                         | Gal4, monoclonal              | Santa Cruz                          | WB: 1/2500             |
|                         | Cleaved caspase-3, polyclonal | Millipore                           | IHC: 1/20              |
|                         | GAPDH, monoclonal             | Millipore                           | WB: 1/5000             |
|                         | MHC I, monoclonal             | Leica (NCL-MHCS)                    | IHC: 1/20<br>WB: 1/200 |
|                         | Desmin, monoclonal            | Dako                                | IHC: 1/200             |
|                         | GFP, polyclonal               | Abcam                               | IHC: 1/250             |
|                         | Laminin, polyclonal           | Sigma                               | IHC: 1/200             |
|                         | Bis-benzimide                 | Sigma                               | IHC: 1/30 000          |
|                         | <b>EMSA</b>                   | Gal4, monoclonal                    | Santa Cruz             |
| NFATc2, monoclonal      |                               | Santa Cruz (sc-7296X)               | 0.8 µg                 |
| MyoD, polyclonal        |                               | Santa Cruz (sc-759X)                | 0.8µg                  |
| <b>IP</b>               | NFATc2, polyclonal            | Santa Cruz (sc-13034)               | 2 µg                   |
